# Supplementary material for: Combination of plasma MMPs and PD-1-binding soluble PD-L1 predicts recurrence in gastric cancer and the efficacy of immune checkpoint inhibitors in non-small cell lung cancer
Source: PubMed Central journal article supplement (PMC11106465; doi:10.3389/fphar.2024.1384731), 2024-05-07
Supplement: Image1.pdf [file Image1.pdf]

## Supplementary Figure 1

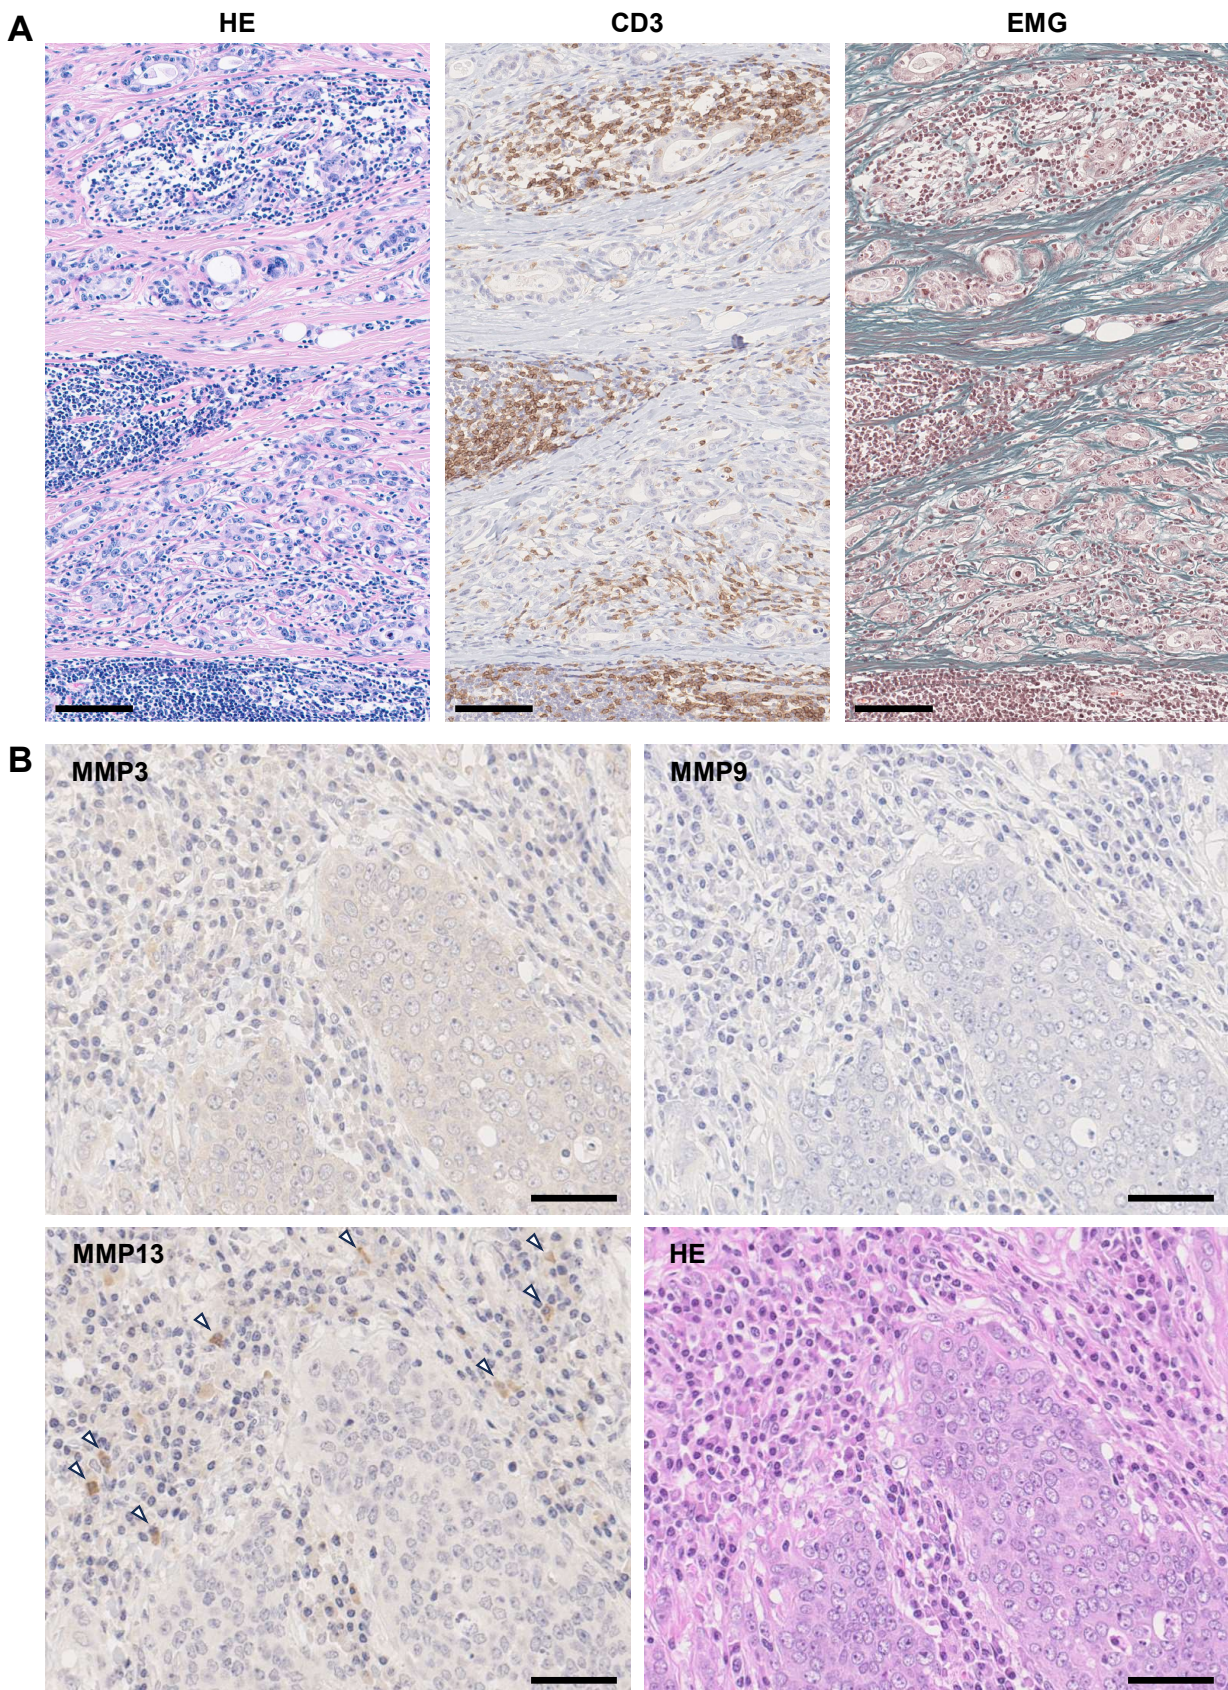

**Histological analysis of gastric cancer tissues.** (A) Serial sections of tumor tissue from Patient 86 were analyzed by H&E, anti-CD3, and EMG staining. Original magnification,  $20\times$ . Scale bars indicate  $100\ \mu\text{m}$ . (B) Representative images of tumor tissues from bsPD-L1<sup>+</sup> patients. Serial sections were analyzed by anti-MMP3, 9, and 13 and H&E staining. Original magnification,  $20\times$ . Scale bars indicate  $50\ \mu\text{m}$ . Nuclei were counterstained with hematoxylin (blue). The arrow heads represent MMP13<sup>+</sup> cells.
