# Supplementary material for: Combination of plasma MMPs and PD-1-binding soluble PD-L1 predicts recurrence in gastric cancer and the efficacy of immune checkpoint inhibitors in non-small cell lung cancer
Source: PubMed Central journal article supplement (PMC11106465; doi:10.3389/fphar.2024.1384731), 2024-05-07
Supplement: Image3.pdf [file Image3.pdf]

### Supplementary Figure 3

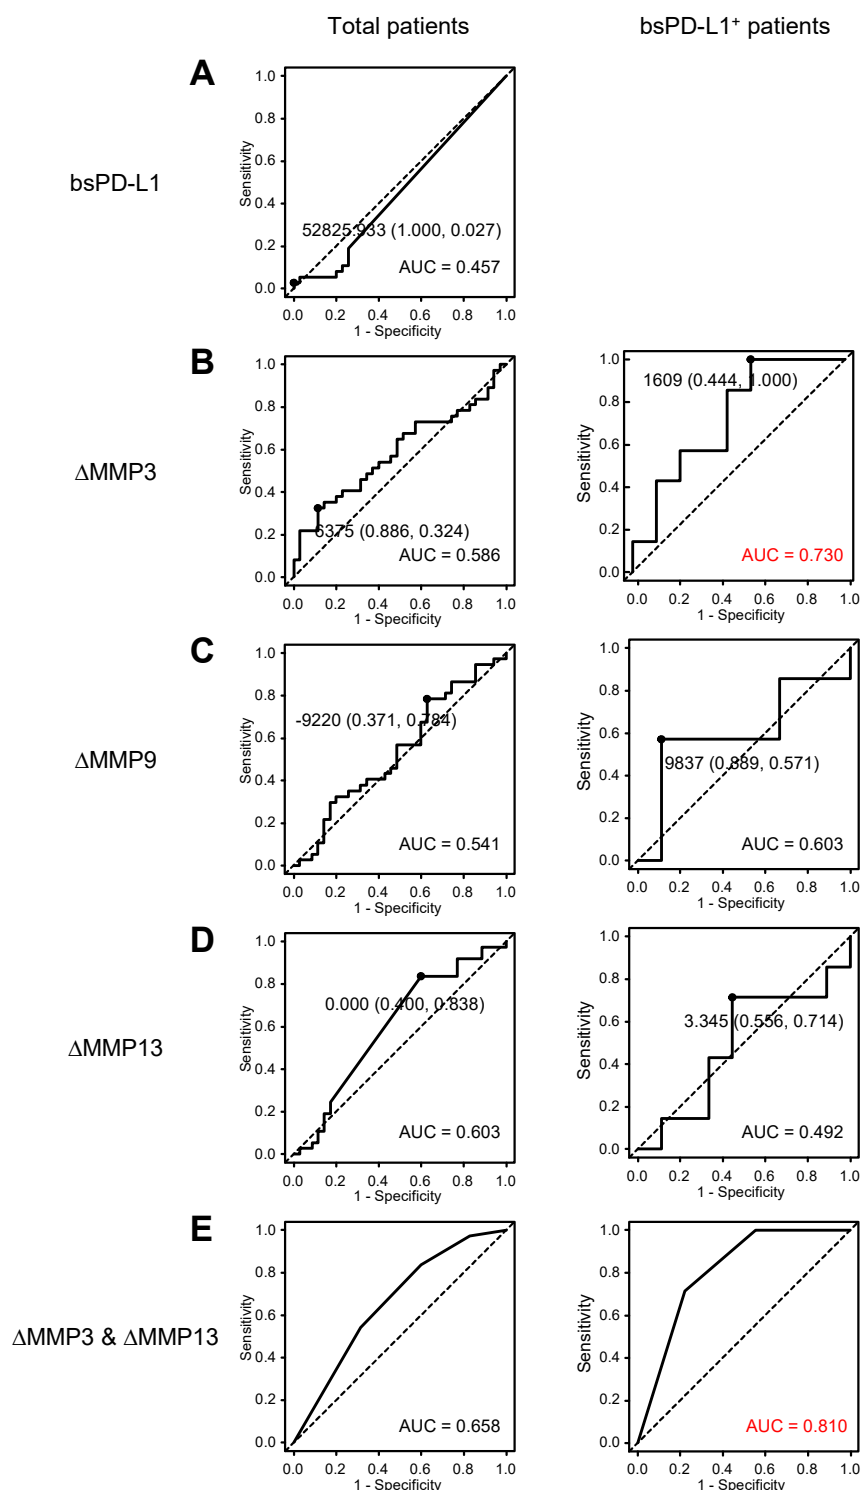

**ROC curves for OS in NSCLC patients.** (A) ROC curves of bsPD-L1 in total patients (n = 72). (B) ROC curves of MMP3 change in total (n=72) and bsPD-L1<sup>+</sup> (n = 16) patients. (C) ROC curves of MMP9 change in total (n=72) and bsPD-L1<sup>+</sup> (n = 16) patients. (D) ROC curves of MMP13 change in total (n=72) and bsPD-L1<sup>+</sup> (n = 16) patients. (E) Multivariate ROC curves of combined MMP3 and MMP13 changes in total (n=72) and bsPD-L1<sup>+</sup> (n = 16) patients.
