# Supplementary material for: Combination of plasma MMPs and PD-1-binding soluble PD-L1 predicts recurrence in gastric cancer and the efficacy of immune checkpoint inhibitors in non-small cell lung cancer
Source: PubMed Central journal article supplement (PMC11106465; doi:10.3389/fphar.2024.1384731), 2024-05-07
Supplement: Table1.pdf [file Table1.pdf]

**Supplementary Table 1** Characteristics of GC patients

| <b>Variables</b> |                   | <b>All patients<br/>(n=117)</b> | <b>bsPD-L1-negative<br/>(n=100)</b> | <b>bsPD-L1-positive<br/>(n=17)</b> | <b>p value</b> |
|------------------|-------------------|---------------------------------|-------------------------------------|------------------------------------|----------------|
| Age              | Median (range)    | 75 (37 - 93)                    | 75 (37-93)                          | 77 (58-88)                         | 0.963          |
| Gender           |                   |                                 |                                     |                                    | 0.234          |
|                  | Male              | 83 (70.9%)                      | 73 (73.0%)                          | 10 (58.8%)                         |                |
|                  | Female            | 34 (29.1%)                      | 27 (27.0%)                          | 7 (41.2%)                          |                |
| Smoking          |                   |                                 |                                     |                                    | 0.831          |
|                  | Never             | 44 (37.6%)                      | 38 (38.0%)                          | 6 (35.3%)                          |                |
|                  | Current or Former | 73 (62.4%)                      | 62 (62.0%)                          | 11 (64.7%)                         |                |
| Histology        |                   |                                 |                                     |                                    | 0.656          |
|                  | Differentiated    | 63 (53.9%)                      | 53 (53.0%)                          | 10 (58.8%)                         |                |
|                  | Undifferentiated  | 54 (46.1%)                      | 47 (47.0%)                          | 7 (41.2%)                          |                |
| T                |                   |                                 |                                     |                                    | 0.484          |
|                  | -1                | 36 (30.8%)                      | 32 (32.0%)                          | 4 (23.5%)                          |                |
|                  | 2-                | 81 (69.2%)                      | 68 (68.0%)                          | 13 (76.5%)                         |                |
| N                |                   |                                 |                                     |                                    | 0.262          |
|                  | 0                 | 61 (52.1%)                      | 50 (50.0%)                          | 11 (64.7%)                         |                |
|                  | 1-                | 56 (47.9%)                      | 50 (50.0%)                          | 6 (35.3%)                          |                |
| M                |                   |                                 |                                     |                                    | 0.520          |
|                  | 0                 | 105 (89.7%)                     | 89 (89.0%)                          | 16 (94.1%)                         |                |
|                  | 1                 | 12 (10.3%)                      | 11 (11.0%)                          | 1 (5.9%)                           |                |
| Disease stage    |                   |                                 |                                     |                                    | 0.713          |
|                  | I - II            | 71 (60.7%)                      | 60 (60.0%)                          | 11 (64.7%)                         |                |
|                  | III - IV          | 46 (39.3%)                      | 40 (40.0%)                          | 6 (35.3%)                          |                |
