# Supplementary material for: Combination of plasma MMPs and PD-1-binding soluble PD-L1 predicts recurrence in gastric cancer and the efficacy of immune checkpoint inhibitors in non-small cell lung cancer
Source: PubMed Central journal article supplement (PMC11106465; doi:10.3389/fphar.2024.1384731), 2024-05-07
Supplement: Table2.pdf [file Table2.pdf]

**Supplementary Table 2** Characteristics of NSCLC patients

| Variable         |                         | All patients<br>(N=72) | bsPD-L1-negative<br>(N=56) | bsPD-L1-positive<br>(N=16) | p value       |
|------------------|-------------------------|------------------------|----------------------------|----------------------------|---------------|
| Age              | Median (range)          | 67 (28-88)             | 68.5 (28-82)               | 68.5 (43-88)               | 0.3312        |
| Gender           |                         |                        |                            |                            | 0.3247        |
|                  | Male                    | 56(77.8%)              | 45(80.4%)                  | 11(68.8%)                  |               |
|                  | Female                  | 16(22.2%)              | 11(19.6%)                  | 5(22.2%)                   |               |
| Smoking          |                         |                        |                            |                            | <b>0.0441</b> |
|                  | Never                   | 11(15.3%)              | 6(10.7%)                   | 5(31.2%)                   |               |
|                  | Current or Former       | 61(84.7%)              | 50(89.3%)                  | 11(68.8%)                  |               |
| EGFR Mutation    |                         |                        |                            |                            | 0.4876        |
|                  | Wild                    | 60(88.2%)              | 46(86.8%)                  | 14(93.3%)                  |               |
|                  | Mutant                  | 8(11.8%)               | 7(13.2%)                   | 1(6.7%)                    |               |
| T                |                         |                        |                            |                            | 0.5127        |
|                  | -1c                     | 18(25.0%)              | 13(23.2%)                  | 5(31.3%)                   |               |
|                  | 2a-                     | 54(75.0%)              | 43(76.8%)                  | 11(68.7%)                  |               |
| N                |                         |                        |                            |                            | 0.2551        |
|                  | 0                       | 11(15.3%)              | 10(19.6%)                  | 1(6.3%)                    |               |
|                  | 1 -                     | 61(84.7%)              | 46(80.3%)                  | 15(93.7%)                  |               |
| M                |                         |                        |                            |                            | 0.9461        |
|                  | 0                       | 49(68.1%)              | 38(67.9%)                  | 11(68.7%)                  |               |
|                  | 1                       | 23(31.9%)              | 18(32.1%)                  | 5(31.3%)                   |               |
| Disease stage    |                         |                        |                            |                            | 0.3164        |
|                  | I - II                  | 10 (13.9%)             | 9 (16.1%)                  | 1 (6.3%)                   |               |
|                  | III - IV                | 62(86.1%)              | 47 (83.9%)                 | 15 (93.8%)                 |               |
| Histology        |                         |                        |                            |                            | 0.7473        |
|                  | Squamous cell carcinoma | 32 (44.4%)             | 24 (42.9%)                 | 8 (50.0%)                  |               |
|                  | Adenocarcinoma          | 32 (44.4%)             | 25 (44.6%)                 | 7 (43.8%)                  |               |
|                  | Non-small               | 8 (11.2%)              | 7 (12.5%)                  | 1 (6.2%)                   |               |
| PD-L1 TPS status |                         |                        |                            |                            | 0.1724        |
|                  | <50                     | 31 (52.5%)             | 22 (47.8%)                 | 9 (69.2%)                  |               |
|                  | 50≤                     | 28 (47.5%)             | 24 (52.2%)                 | 4 (30.8%)                  |               |
